# Supplementary material for: Development of a Novel Quinoline Derivative as a P-Glycoprotein Inhibitor to Reverse Multidrug Resistance in Cancer Cells
Source: MDPI journal article supplement (doi:10.3390/biology8040075), 2019-10-01
Supplement: s1 [file s1]

# Development of a Novel Quinoline Derivative 160a as a P-glycoprotein Inhibitor to Reverse Multi-Drug Resistance in Cancer Cells

## Supplementary Material

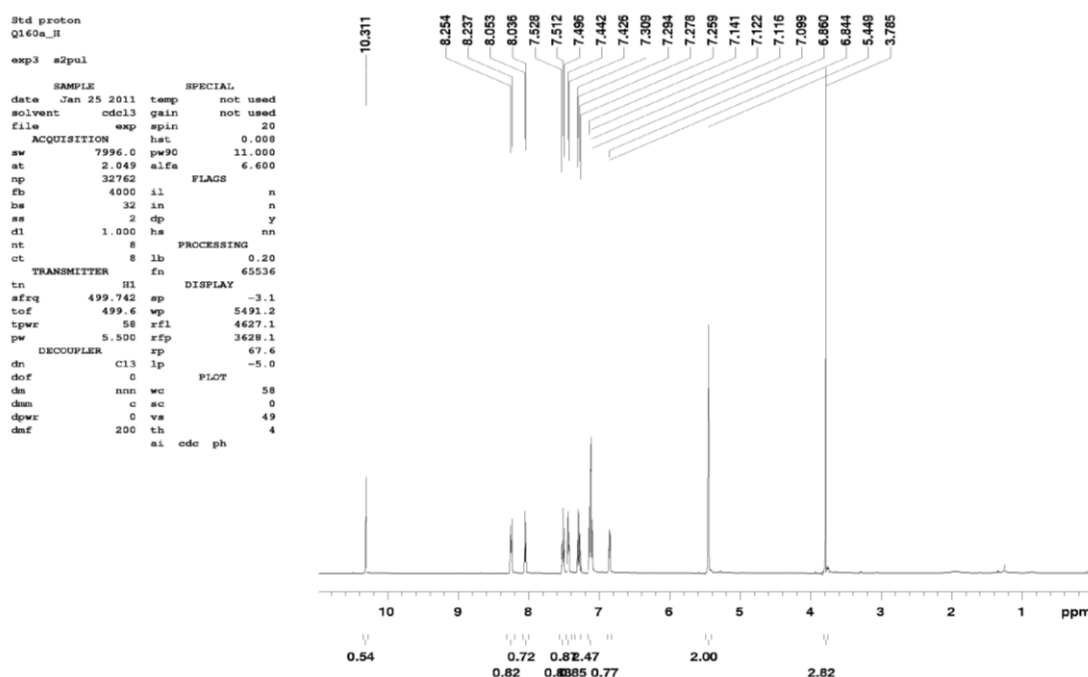

**Figure S1.**  $^1\text{H}$ -NMR spectrum of compound 160a.  $^1\text{H}$ -NMR (500 MHz,  $\text{CDCl}_3$ ):  $\delta$  3.79 (s, 3H), 5.45 (s, 2H), 6.85 (d, 1H,  $J = 8.0$  Hz), 7.12 (t, 3H,  $J = 8.5$  Hz), 7.29 (t, 1H,  $J = 7.5$  Hz), 7.43 (d, 1H,  $J = 8.0$  Hz), 7.51 (t, 1H,  $J = 8.0$  Hz), 8.04 (d, 1H,  $J = 8.5$  Hz), 8.25 (d, 1H,  $J = 8.5$  Hz), 10.31 (s, 1H);  $^{13}\text{C}$ -NMR (100 MHz,  $\text{CDCl}_3$ ):  $\delta$  55.88, 71.63, 111.75, 113.19, 114.12, 118.45, 119.83, 120.60, 130.27, 130.38, 132.04, 137.86, 138.86, 140.95, 152.21, 155.80, 160.61, 194.51; HRMS (ESI): Calcd. for  $\text{C}_{18}\text{H}_{16}\text{NO}_3$   $[\text{M}+\text{H}]^+$ , 294.1130; found 294.1118; melting point = 85.6–87.0  $^\circ\text{C}$ .
